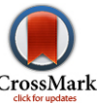

# Lower Fetuin-A, Retinol Binding Protein 4 and Several Metabolites after Gastric Bypass Compared to Sleeve Gastrectomy in Patients with Type 2 Diabetes

Mia Jüllig<sup>1,2</sup>, Shelley Yip<sup>3</sup>, Aimin Xu<sup>4</sup>, Greg Smith<sup>5</sup>, Martin Middleditch<sup>1,2</sup>, Michael Booth<sup>6</sup>, Richard Babor<sup>7</sup>, Grant Beban<sup>8</sup>, Rinki Murphy<sup>3\*</sup>

**1** Maurice Wilkins Centre for Molecular Biodiscovery, University of Auckland, Auckland, New Zealand, **2** School of Biological Sciences, University of Auckland, Auckland, New Zealand, **3** Department of Medicine, University of Auckland, Auckland, New Zealand, **4** Department of Medicine, Department of Pharmacology and Pharmacy, The University of Hong Kong, Hong Kong, Special Administrative Region, China, **5** Department of Pharmacology, University of New South Wales, Sydney, New South Wales, Australia, **6** Department of Surgery, North Shore Hospital, Auckland, New Zealand, **7** Department of Surgery, Middlemore Hospital, Auckland, New Zealand, **8** Department of Surgery, Auckland City Hospital, Auckland, New Zealand

## Abstract

**Background:** Bypass of foregut secreted factors promoting insulin resistance is hypothesized to be one of the mechanisms by which resolution of type 2 diabetes (T2D) follows roux-en-y gastric bypass (GBP) surgery.

**Aim:** To identify insulin resistance-associated proteins and metabolites which decrease more after GBP than after sleeve gastrectomy (SG) prior to diabetes remission.

**Methods:** Fasting plasma from 15 subjects with T2D undergoing GBP or SG was analyzed by proteomic and metabolomic methods 3 days before and 3 days after surgery. Subjects were matched for age, BMI, metformin therapy and glycemic control. Insulin resistance was calculated using homeostasis model assessment (HOMA-IR). For proteomics, samples were depleted of abundant plasma proteins, digested with trypsin and labeled with iTRAQ isobaric tags prior to liquid chromatography-tandem mass spectrometry analysis. Metabolomic analysis was performed using gas chromatography-mass spectrometry. The effect of the respective bariatric surgery on identified proteins and metabolites was evaluated using two-way analysis of variance and appropriate post-hoc tests.

**Results:** HOMA-IR improved, albeit not significantly, in both groups after surgery. Proteomic analysis yielded seven proteins which decreased significantly after GBP only, including Fetuin-A and Retinol binding protein 4, both previously linked to insulin resistance. Significant decrease in Fetuin-A and Retinol binding protein 4 after GBP was confirmed using ELISA and immunoassay. Metabolomic analysis identified significant decrease of citrate, proline, histidine and decanoic acid specifically after GBP.

**Conclusion:** Greater early decrease was seen for Fetuin-A, Retinol binding protein 4, and several metabolites after GBP compared to SG, preceding significant weight loss. This may contribute to enhanced T2D remission observed following foregut bypass procedures.

**Citation:** Jüllig M, Yip S, Xu A, Smith G, Middleditch M, et al. (2014) Lower Fetuin-A, Retinol Binding Protein 4 and Several Metabolites after Gastric Bypass Compared to Sleeve Gastrectomy in Patients with Type 2 Diabetes. PLoS ONE 9(5): e96489. doi:10.1371/journal.pone.0096489

**Editor:** Pankaj K. Singh, University of Nebraska Medical Center, United States of America

**Received:** November 17, 2013; **Accepted:** April 8, 2014; **Published:** May 6, 2014

**Copyright:** © 2014 Jüllig et al. This is an open-access article distributed under the terms of the Creative Commons Attribution License, which permits unrestricted use, distribution, and reproduction in any medium, provided the original author and source are credited.

**Funding:** This work was supported by the Jens Henrick Jensen fund and the NovoNordisk Diabetes grant fund. The funders had no role in study design, data collection and analysis, decision to publish, or preparation of the manuscript.

**Competing Interests:** Co-author Aimin Xu is a PLOS ONE Editorial Board member. This does not alter the authors' adherence to PLOS ONE Editorial policies and criteria. This study was funded by the Jens Henrick Jensen fund and the NovoNordisk Diabetes grant fund. This does not alter their adherence to PLOS ONE policies on sharing data and materials.

\* E-mail: R.Murphy@auckland.ac.nz

## Introduction

The success of bariatric surgery in obtaining remission of type 2 diabetes (T2D) varies with the type of surgery performed, with generally higher rates observed after gastric bypass (GBP) or biliopancreatic diversion, than with purely restrictive operations such as gastric banding [1,2]. This is not explained by the difference in overall weight loss achieved by the different procedures, because weight loss achieved is not significantly

associated with T2D outcome in individuals and there is no difference in weight loss between patients with remission of T2D and non-remission between or within bariatric procedures [3]. One of the mechanisms by which procedures involving intestinal rearrangement such as GBP and biliopancreatic diversion normalize glycaemia is through greater improvement in insulin resistance, seen to a lesser extent following non-diversionary surgeries such as sleeve gastrectomy (SG) or gastric banding [4,5].

To explain the rapid and sustained impact of GBP on improving glycaemia in patients with type 2 diabetes, two hypotheses have been proposed: The hindgut hypothesis suggests that the rapid transit of nutrients to the distal bowel improves glucose metabolism by stimulating secretion of the incretin hormone GLP-1 from the ileum and colon L-cells [6]. Indeed, prandial GLP-1 secretion acts to increase glucose-stimulated insulin secretion and improves post-prandial glycaemia, however this does not explain the rapid normalization of fasting glycaemia seen following GBP [7]. The foregut hypothesis proposes that nutrient bypass of the upper gut leads to reduction in secretion of an unidentified gut peptide which promotes insulin resistance [8,9]. Identification of such a gut peptide could yield insights into the pathophysiology of obesity associated T2D and new therapeutic targets.

Proteomics refers to the identification and/or quantification of the proteins expressed in a tissue, and is used for both inter- and intra-individual comparisons of samples [10]. Early proteomic studies often relied on two-dimensional polyacrylamide gel electrophoresis [11] while newer proteomic approaches e.g. isobaric tagging of peptides separated by liquid chromatography and analyzed using tandem mass spectrometry have been developed to overcome limitations associated with gel electrophoresis and allow more rapid and accurate proteomic analysis of complex proteinaceous samples. New opportunities for discovery in biofluids have also opened up with the development of selective depletion strategies for highly abundant proteins which otherwise tend to dominate the analysis, obstructing the analysis of biomarkers and other key proteins that are often in low abundance [11]. Complementing proteomic techniques, metabolomic analysis offers a highly sensitive means to profile a large number of metabolites in various metabolic pathways [12] and provides useful information on activity of metabolic pathways e.g. lipid and carbohydrate metabolism [13,14].

In this study we combined proteomic and metabolomic approaches to explore the foregut hypothesis. We aimed to identify proteins as well as metabolites which were decreased following GBP (foregut bypassed from nutrient flow), but not after SG (foregut intact with nutrient flow), with special focus on molecules already linked to insulin resistance. The post-operative time point (3 days post-operatively) was carefully chosen in order to place focus on cause rather than effect. Three days after surgery the greater expected T2D remission following GBP than SG was still negligible, hence any significant differences found in the plasma proteomic and metabolomic profiles were unlikely resulting from T2D remission. The effect of bypassing the foregut on secretion of molecules should however be evident shortly after GBP. By performing within-patient comparisons of fasting plasma protein and metabolite profiles before and soon after either GBP or SG when post-surgical caloric intake and physical activity was equivalent and very little weight loss had occurred, we also avoided confounding effects of weight loss and differences in caloric intake.

## Materials and Methods

A non-randomised, matched, prospective controlled intervention trial that compared the acute effect of GBP to SG, compared with matched caloric intake, on glycemia among obese patients with type 2 diabetes has been previously described with its inclusion and exclusion criteria [15]. Briefly, from 1 August 2010 to 31 March 2012, 21 obese patients with type 2 diabetes treated with oral glucose lowering therapies (but not incretin hormone therapies) were recruited by contacting patients on the bariatric

surgery waiting lists, 10 who were scheduled for SG and 11 who were scheduled for GBP. A total of 7 patients who had SG and 8 who had GBP, all treated with metformin monotherapy at baseline, were eligible for inclusion in this pilot proteomic and metabolomic study. Baseline and follow up assessments were conducted in the patients' homes at 3 pre- and post-operative days. The protocol, allocation and supporting TREND checklist for this study are available as supporting information (Checklist S1 and Protocol S1), and Figure 1 for the allocation flow chart. All patients were prescribed a hypocaloric diet with three servings of Optifast (152 Calories) per day during the three weeks prior to surgery and were instructed to fast from midnight the night before surgery. Patients received general anaesthesia with atracurium and propofol or equivalent agents for both laparoscopic surgeries. The GBP consisted of a 100 cm antecolic Roux-limb with hand-sewn pouch-jejunostomy, a 60 cm bilio-pancreatic limb and a hand sewn small bowel anastomosis. The SG was performed by a longitudinal resection of the stomach against a 32 French bougie from just lateral to the angle to His to 2 cm proximal to the pylorus.

Post-operative IV fluids with Plasmalyte were administered until oral fluid intake was 1 litre per day (approximately 48 hours). Routine medications given for the first 48 hours included analgesia as required (paracetamol, tramadol and fentanyl), anti-emetics (ondansetron, cyclizine and metoclopramide), and subcutaneous heparin as prophylaxis for venous thrombo-embolism. Metformin therapy was stopped from the day of surgery until the end of the study period. Standard post-operative oral intake instructions were as follows: Day 1, sips of water; Day 2-4, free oral fluids with clear soups, low fat smoothies or Optifast.

Approximately 3 days before surgery, and again 3 days after surgery, in both cases following fasting for at least 10 hours, blood samples were collected into EDTA tubes and centrifuged following

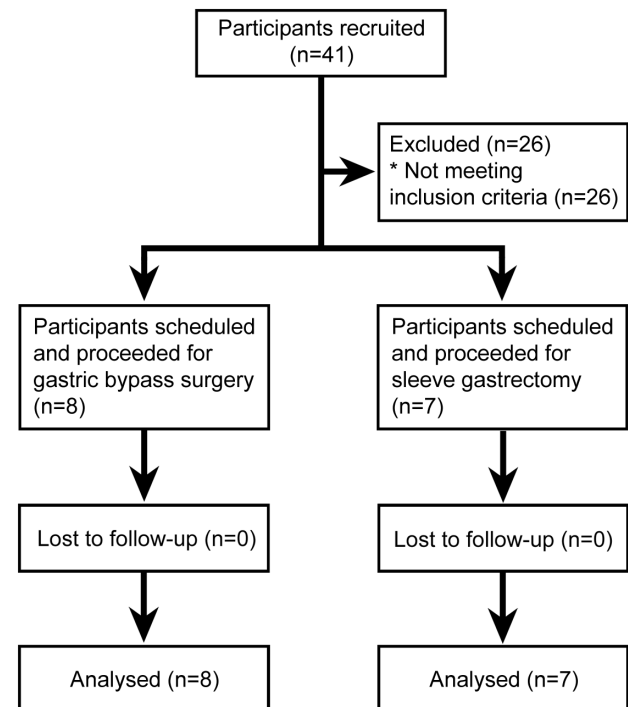

**Figure 1. 2010 CONSORT flow diagram for the study.**  
doi:10.1371/journal.pone.0096489.g001

routine procedures to yield plasma samples which were stored at  $-80^{\circ}\text{C}$  until analysis.

### Ethics statement

This prospective study was approved by the Northern X Regional Ethics Committee, New Zealand and was registered with the Australian New Zealand Clinical Trials Registry (ACTRN12609000679280). Informed, written consent was obtained from all patients.

### Metabolic parameters

Serum insulin and glucose were quantified using the Human Metabolic Hormone Panel (Milliplex, Millipore) and Hitachi 902 auto-analyzer (Hitachi High Technologies Corporation), respectively. HOMA-IR was calculated as (fasting insulin in  $\mu\text{U}/\text{ml}$   $\times$  fasting glucose in  $\text{mmol}/\text{L}$ )/22.5.

### Proteomic procedures

Plasma samples were subjected to immunodepletion of 20 highly abundant serum proteins (albumin, immunoglobulins (IgG, IgM, IgD), transferrin, fibrinogen,  $\alpha$ -1-antitrypsin,  $\alpha$ -2-antitrypsin, complements C3, C4, C1q, haptoglobin, apolipoproteins (A1, A2, B), acid-1-glycoprotein, ceruloplasmin, prealbumin, plasminogen) using a ProteoPrep 20 plasma immunodepletion centrifugal device (Sigma Aldrich, St Louis, MO, USA) according to the manufacturer's instructions. Depleted samples were stored at  $-80^{\circ}\text{C}$  until further processing. Sample volumes containing 40  $\mu\text{g}$  total protein were reduced at  $55^{\circ}\text{C}$  for 15 minutes using 10 mM dithiothreitol, alkylated with 50 mM iodoacetamide (Sigma) at room temperature for 45 minutes in the dark and then digested at  $40^{\circ}\text{C}$  for 30 minutes with 2  $\mu\text{g}$  of sequencing grade trypsin (Promega, Madison, WI, USA) in a chilled microwave (CEM Corporation, Matthews, NC, USA). Digests were cleaned up on 10 mg Oasis HLB SPE cartridges (Waters, Milford, MA, USA), eluted with 300  $\mu\text{l}$  of 60% acetonitrile, dried in a vacuum centrifuge (Thermo Savant, Holbrook, NY, USA) and reconstituted with 20  $\mu\text{l}$  of iTRAQ dissolution buffer (0.5 M triethylammonium bicarbonate at pH 8.5; Applied Biosystems, Foster City, CA, USA). Two samples from each subject (pre- and post- surgery) were derivatised with one of eight iTRAQ labels and combined in groups of eight. Pooled samples were separated by multidimensional liquid chromatography using a strong cation exchange column, followed by a reversed phase column (150 mm  $\times$  300  $\mu\text{m}$  Zorbax SB 300A C-18 column, Agilent Technologies, Santa Clara, CA, USA). The column effluent was analyzed on a QSTAR-XL hybrid mass spectrometer (Applied Biosystems). A TOF-MS scan was made from  $m/z$  300-1600 and the three most intense multiply-charged precursors isolated for fragmentation, with MS/MS spectra recorded from  $m/z$  75-1600.

The patient samples were first analyzed in groups of eight as described above across four liquid chromatography-tandem mass spectrometry (LC-MS/MS) runs; an additional LC-MS/MS run containing selected samples from all four individual runs was then conducted to enable comparisons between runs.

The LC-MS/MS outputs were used to search the human IPI database (Version 3.87) using ProteinPilot software version 4.0 (Applied Biosystems) and protein matches with scores above the 1% false discovery rate threshold for each run were accepted for quantitative analysis. In cases where the software identified an unnamed or putative protein from the database, the amino acid sequence of the protein was used to conduct a BLAST search (available online at <http://blast.ncbi.nlm.nih.gov/Blast.cgi>) to gain a more meaningful identifier.

The ProteinPilot peptide summaries were used to manually calculate the abundance of each protein in each sample relative to a pre-GBP sample included in the same run as previously described [16]. By comparing in the additional run all pre-GBP samples that were used as reference samples within the previous runs, results obtained from separate LC-MS/MS runs could be scaled and effectively used to compare all samples across all runs. Finally, average ratios calculated in log space for each group were converted to linear space for presentation. Confidence intervals were calculated by converting to linear space the average ratios ( $\ln$ )  $\pm$  SEM ( $\ln$ ). Data files containing the complete proteomic output are available from the authors upon request.

Proteins of interest were validated using immunoassay or ELISA. Retinol Binding Protein 4 (RBP4) was measured as per manufacturer's protocol using the Human RBP4 Immunoassay Kit (AIS antibody and Immunoassay Services, Hong Kong). Fetuin-A were measured by a sandwich ELISA (BioVendor Laboratory Medicine, Brno, Czech Republic).

### Metabolomics procedures

For each sample, a 300  $\mu\text{L}$  aliquot of plasma was spiked with 20  $\mu\text{L}$  of internal standard (10 mM d4-alanine; 2,3,3,3-d4-dl-alanine, 98 atom % D; Sigma-Aldrich), then lyophilised overnight before being extracted first with 500  $\mu\text{L}$  of 50% methanol, then with 500  $\mu\text{L}$  of 80% methanol. Extracted supernatants were pooled and freeze-dried. Dried samples were chemically derivatised by methyl chloroformate and analyzed by Gas Chromatography-Mass spectrometry (Agilent 7890A coupled with a 5975 inert Mass Spectrometry Detector). Chromatograms were processed using an in-house metabolite library and a custom-made R-software package, with manual checking and correction of information (GC-MS peak intensities). Metabolomic data for each sample were normalized using the internal standard prior to calculation of relative abundances of the separate metabolites in the four different groups.

### Statistical analysis

All statistical calculations were performed using GraphPad Prism version 6.00 (GraphPad Software, La Jolla California USA).

Statistical significance of the effect of bariatric surgery on fasting glucose, fasting insulin and HOMA-IR was assessed using repeated measures, mixed model two-way ANOVA, pairing each post-operative sample with the pre-operative sample from the same patient.

Statistical analysis of the proteomic data was done after conversion of all ratios to their natural logs, as customary for iTRAQ data. The separate effect of surgery (post- versus pre-) as well as surgery group (GBP versus SG) were calculated for all identified proteins using repeated measures, mixed model two-way ANOVA paired as above. All proteins showing significant effect of bariatric surgery ( $p < 0.05$ ), were further evaluated using Sidak's multiple comparisons post-hoc test to test the specific effect of GBP and SG on protein levels.

The results of the immunoassay and ELISA validations were tested using two-tailed one sample t tests.

For metabolomic data, the separate effects of bariatric surgery as well as surgery type were calculated for all identified metabolites using repeated measures, mixed model two-way ANOVA. Metabolites showing significant effect of bariatric surgery ( $p < 0.05$ ) were further evaluated using Sidak's multiple comparisons post-hoc test to test the specific effect of GBP and SG on metabolite levels.

Correlation between selected proteins/metabolites and HOMA-IR was evaluated using Spearman correlations.

## Results

### Clinical characteristics

Fifteen obese subjects participating in a prospective bariatric surgery study [15] (8 scheduled for GBP, 7 for SG) were selected for this study based on similarity of baseline characteristics (Table 1). All patients were treated with metformin for T2D prior to surgery only. Despite cessation of metformin therapy post-operatively, mean fasting glucose and insulin levels, as well as insulin resistance (HOMA-IR) improved after both GBP and SG, although the differences did not reach statistical significance (Table 1).

### Proteomic analysis

Of a total of 85 proteins identified with sufficient iTRAQ label and in three or more individuals per surgery group (Fig. 2), two-way ANOVA analysis showed significant effect of bariatric surgery for 32 proteins when time (before vs. after surgery) was plotted against surgery type (GBP vs SG). Of these, 23 proteins were significantly different also in post hoc tests, where the effects of the two surgery types were analyzed separately (Table 2). Summary statistics for all 85 identified proteins are available in Table S1. Specifically, six proteins were significantly lower and four significantly higher after both surgery types, four proteins increased and one decreased after SG only while only one protein increased after GBP. Seven proteins were significantly lower after GBP only and hence matched the main aim of the study. Of these, two (RBP4 and Fetuin-A) were previously reported in the context of insulin resistance. The significant decrease in RBP4 (decreased to 72% after GBP,  $p < 0.01$ ) and Fetuin-A (decreased to 75% after

GBP,  $p < 0.05$ ) as demonstrated by the iTRAQ proteomic study is detailed in Figure 3. Validation analysis by immunoassay and ELISA confirmed significant decrease of RBP4 ( $-51.5 \pm 6.1\%$ ,  $p < 0.0001$ ) and Fetuin-A ( $-27.0 \pm 3.5\%$ ,  $p = 0.0001$ ) on day 3 after GBP (Fig. 4); consistent with the iTRAQ results. As shown in Table 3, the measured levels of both RBP4 and Fetuin-A showed significant correlation with HOMA-IR.

### Metabolomic analysis

A total of 45 metabolites were detected, of which 19 were fatty acids and 20 were amino acids or amino acid derivatives. Eight metabolites showed significant ( $p < 0.05$ ) impact of bariatric surgery in the two-way ANOVA; post hoc analysis detected significant effect of one or both specific surgery types for seven of these (Table 4). Figure 5 shows significantly affected and other relevant metabolites in their implicated pathways. Summary statistics for all 45 detected metabolites are available in Table S2.

## Discussion

We hypothesized that key species promoting insulin resistance (proteins or their downstream metabolic targets) would be decreased following GBP, where the foregut is bypassed from nutrient flow, but not after SG, where the foregut remains intact to nutrient flow. To identify such causal metabolic factors, we chose to study subjects shortly after both types of surgery, specifically before significant weight loss had occurred and before differences in remission of diabetes between the two types of surgery were evident.

**Table 1.** Subject characteristics and effect of surgeries on fasting glucose, fasting insulin and HOMA-IR.

|                                         | GBP (n = 8) |                    | SG (n = 7)  |                    |
|-----------------------------------------|-------------|--------------------|-------------|--------------------|
| <b>Sex</b>                              | Females: 8  |                    | Females: 6  |                    |
|                                         | Males: 0    |                    | Males: 1    |                    |
| <b>Age (yrs)</b>                        | 41.0 ± 3.1  |                    | 46.8 ± 2.9  |                    |
| <b>Ethnicity</b>                        | 5 NZE       |                    | 6 NZE       |                    |
|                                         | 2 PI        |                    | 1 PI        |                    |
|                                         | 1 Asian     |                    |             |                    |
| <b>Duration diabetes (yrs)</b>          | 3.7 ± 0.7   |                    | 3.1 ± 0.6   |                    |
| <b>BMI (kg/m<sup>2</sup>)</b>           | 42.1 ± 4.0  |                    | 42.3 ± 5.9  |                    |
| <b>HbA1c (%)</b>                        | 7.2 ± 0.2   |                    | 7.8 ± 0.7   |                    |
| (mmol/mol)                              | 54.8 ± 2.5  |                    | 61.9 ± 7.8  |                    |
| <b>Duration of surgery (hours)</b>      | 2.60 ± 0.08 |                    | 2.14 ± 0.01 |                    |
|                                         | Baseline    | Day 3 post surgery | Baseline    | Day 3 post surgery |
| <b>Fasting glucose (mmol/L)</b>         | 6.9 ± 0.7   | 5.9 ± 0.5          | 7.0 ± 0.7   | 6.1 ± 0.6          |
| p (pre Vs post bariatric surgery): 0.06 |             |                    |             |                    |
| p (SG Vs GBP): 0.82                     |             |                    |             |                    |
| <b>Fasting insulin (μIU/mL)</b>         | 17.5 ± 6.9  | 10.8 ± 2.7         | 20.6 ± 5.6  | 16.9 ± 6.0         |
| p (pre Vs post bariatric surgery): 0.15 |             |                    |             |                    |
| p (SG Vs GBP): 0.53                     |             |                    |             |                    |
| <b>Log HOMA-IR</b>                      | 1.07 ± 0.45 | 0.75 ± 0.32        | 1.64 ± 0.25 | 1.26 ± 0.31        |
| p (pre Vs post bariatric surgery): 0.18 |             |                    |             |                    |
| p (SG Vs GBP): 0.23                     |             |                    |             |                    |

Data are shown as mean ± S.E.M.; p values are derived from Mixed Model Repeated Measures Two-Way ANOVA. Abbreviations: NZE, NZ European; PI, Pacific Islander; HOMA-IR, insulin resistance calculated by homeostatic model assessment.

doi:10.1371/journal.pone.0096489.t001

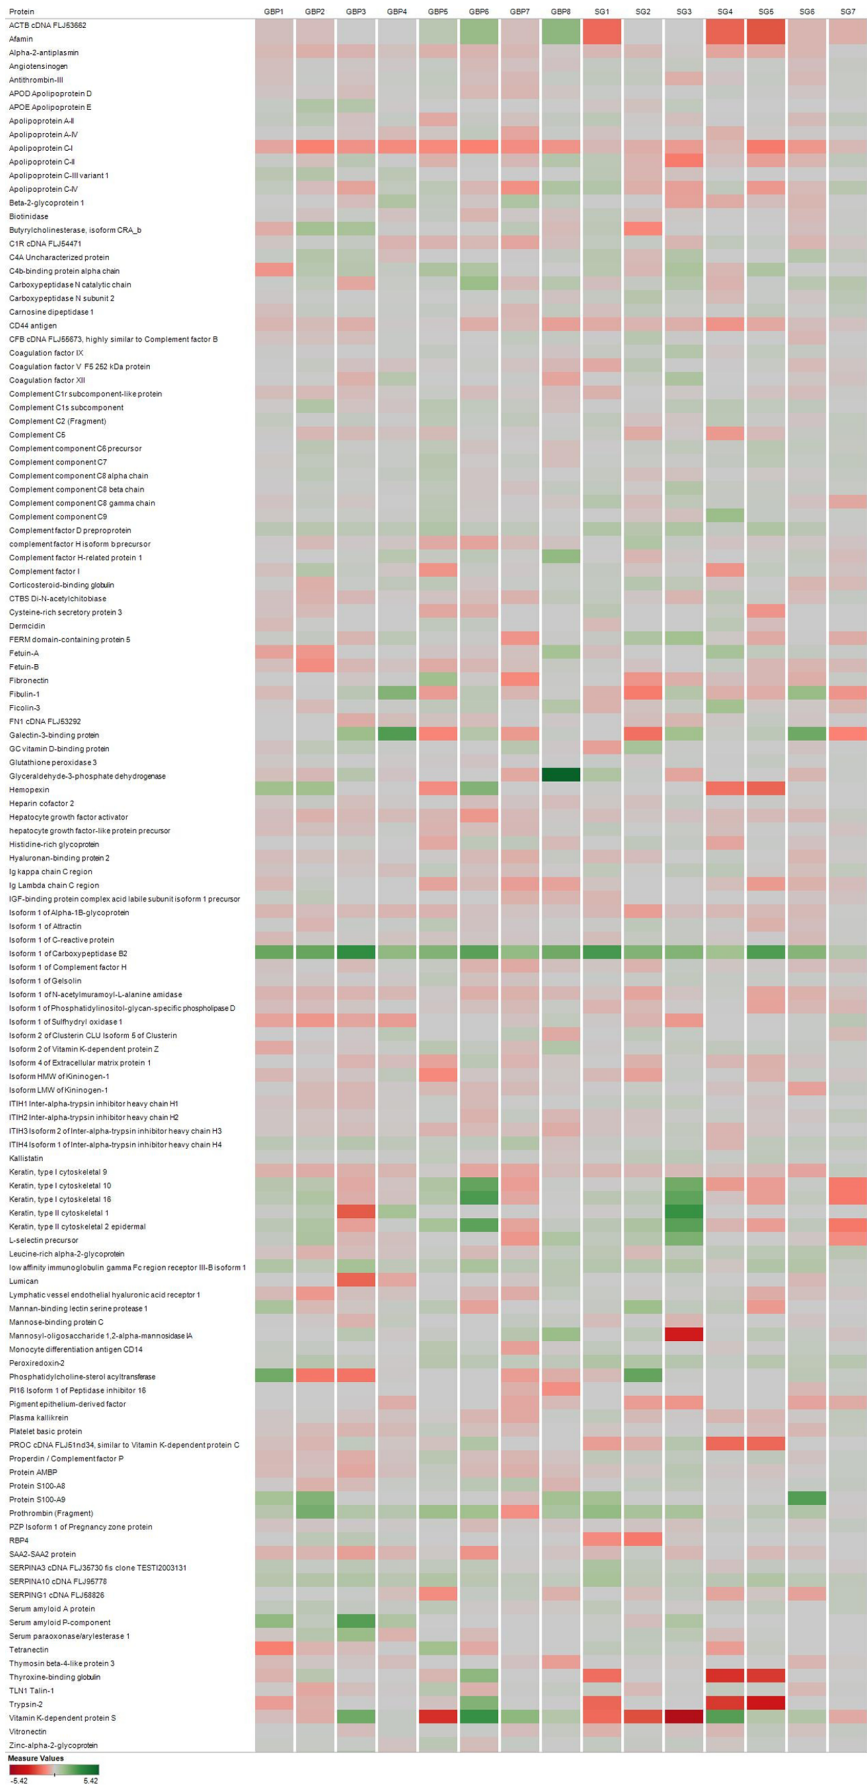

**Figure 2. Heat map showing patient specific changes of all detected proteins.** Each protein is represented on an individual row with data from each patient stacked in columns (GBP1 to GBP8 for GBP, SG1-SG7 for SG). Intensity of color corresponds to the degree of change from red (decrease) to green (increase) after surgery. doi:10.1371/journal.pone.0096489.g002

Amongst other findings, our proteomic analysis showed a significant decrease in two proteins involved in insulin resistance, RBP4 and Fetuin-A, [17,18], three days after GBP but not SG. Notably, although insulin resistance had not improved significantly three days after bariatric surgery, the statistically significant correlations between the levels of RBP4 and Fetuin-A with HOMA-IR support a direct relationship between lower levels of these proteins and improved insulin resistance in our dataset.

RBP4 is a vitamin A (retinol) transport protein secreted by hepatocytes and adipocytes into the bloodstream. This protein carries retinol to peripheral tissues where it is converted into ligands for nuclear hormone receptors and regulates gene transcription. In recent years, RBP4 has been proposed to be a cardiometabolic risk factor associated with T2D, obesity and hyperlipidaemia [19] and it appears to induce insulin resistance in skeletal muscle, liver and adipose tissue in vitro [20]. The regulation of RBP4 is unclear, however RBPR2 was recently identified as a high affinity RBP4 receptor expressed primarily in liver and small intestine and induced in adipocytes of obese mice [21]. Studies show that RBP4 is decreased with hypocaloric diet

[22] as well as weight loss achieved by lifestyle [23] or weight loss achieved by SG bariatric surgery [12,24].

Fetuin-A is produced in the liver and has a role in the inhibition of insulin-receptor tyrosine kinase, which attenuates insulin signalling and triggers insulin resistance [25,26] and also down-regulates adiponectin, a known insulin sensitizer secreted by adipose tissue [27]. Fetuin-A has recently been shown to be an endogenous ligand for Toll-like receptor 4 (TLR4) through which it has a critical role in stimulating adipose tissue inflammation resulting in insulin resistance [28]. The regulation of Fetuin-A is thought to be through pro-inflammatory cytokines [29,30]. Studies suggest that those with high Fetuin-A levels have increased risk of myocardial infarction [31], stroke [32], and incident diabetes [17]. Fetuin-A levels have also been reported to decrease after weight

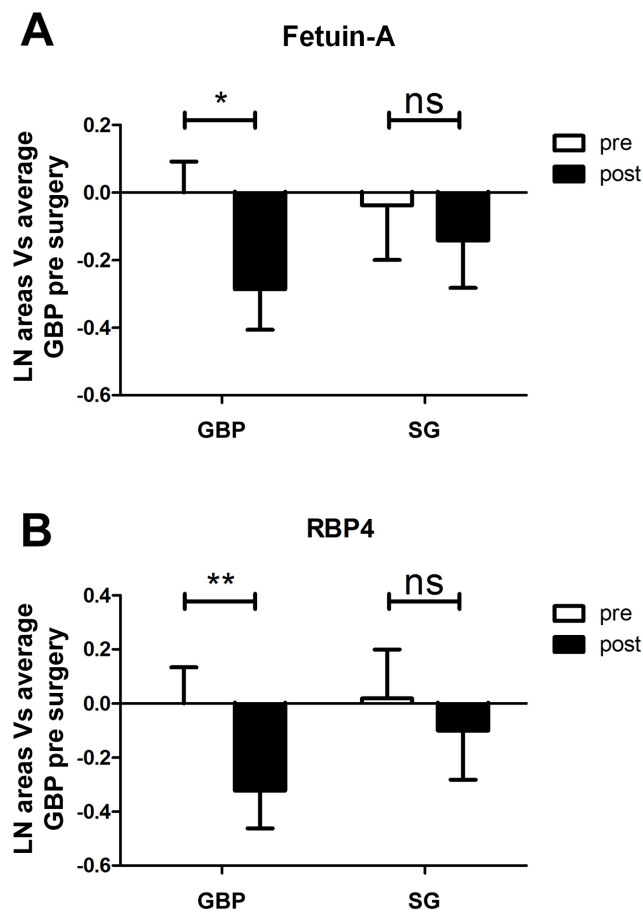

**Figure 3. Proteomic results for Fetuin-A and RBP4.** Relative abundance pre and post GBP and SG for Fetuin-A (A), and RBP4 (B) as per iTRAQ proteomic study, showing significant decrease after GBP but not after SG for both proteins. Abbreviations: \*,  $p < 0.05$ ; \*\*,  $p < 0.01$ . doi:10.1371/journal.pone.0096489.g003

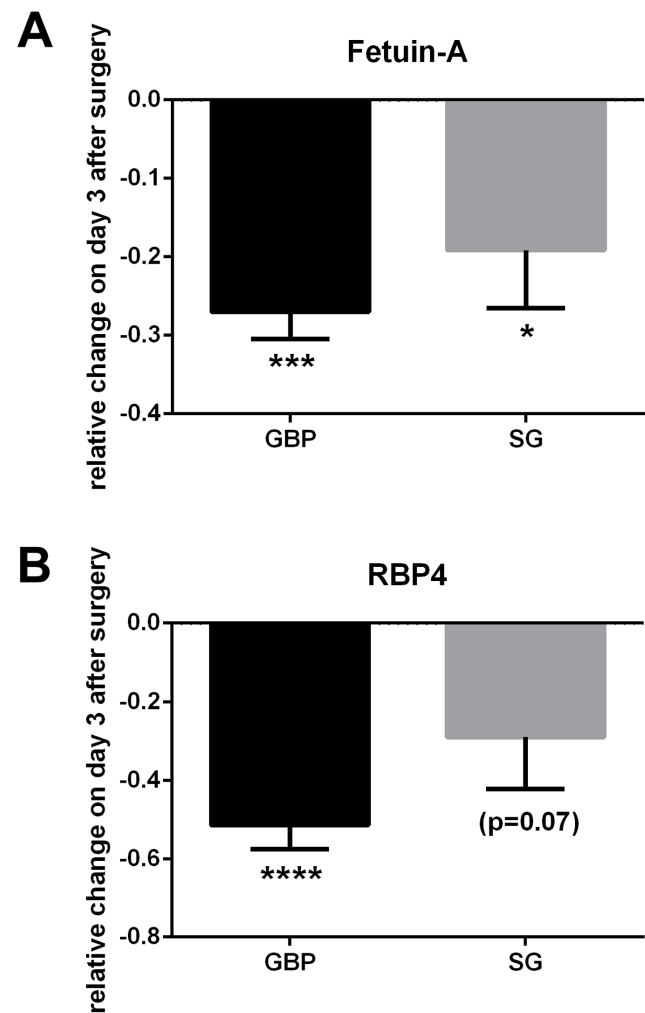

**Figure 4. Validation of proteomic results for Fetuin-A and RBP4.** Panel A: Fetuin-A levels were found by ELISA to decrease to some extent after both surgery types, however a more dramatic decrease was found after GBP. Panel B: significantly lower levels of RBP4 were detected by immunoassay after GBP only. Abbreviations: \*,  $p < 0.05$ ; \*\*\*,  $p < 0.001$ ; \*\*\*\*,  $p < 0.0001$ . doi:10.1371/journal.pone.0096489.g004



**Table 2.** Proteins displaying post-operative changes in relative abundance (3 days after GBP and/or SG compared to 3 days prior to surgery) according to the proteomic study.

| Protein name (Accession No)                                                            | pre GBP/pre GBP     | post GBP/pre GBP                  | pre SG/pre GBP      | post SG/pre GBP                   |
|----------------------------------------------------------------------------------------|---------------------|-----------------------------------|---------------------|-----------------------------------|
| <i>Significant change after GBP only</i>                                               |                     |                                   |                     |                                   |
| Isoform 2 of Inter-alpha-trypsin inhibitor heavy chain H3 (IPI00876950.1)              | 1.00<br>(0.88–1.14) | <b>1.33</b> **<br>(1.16–1.54)     | 1.15<br>(1.00–1.32) | <b>1.29</b> (n.s.)<br>(1.09–1.53) |
| RBP4 (retinol-binding protein 4) (IPI00844536.2)                                       | 1.00<br>(0.87–1.14) | <b>0.72</b> **<br>(0.63–0.83)     | 1.02<br>(0.85–1.22) | <b>0.90</b> (n.s.)<br>(0.75–1.09) |
| Alpha-2-HS-glycoprotein (= Fetuin-A) (IPI00953689.1)                                   | 1.00<br>(0.91–1.10) | <b>0.75</b> *<br>(0.67–0.85)      | 0.96<br>(0.82–1.13) | <b>0.87</b> (n.s.)<br>(0.75–1.00) |
| Coagulation factor X (IPI00019576.1)                                                   | 1.00<br>(0.87–1.14) | <b>0.83</b> *<br>(0.71–0.96)      | 1.07<br>(0.87–1.32) | <b>0.98</b> (n.s.)<br>(0.78–1.23) |
| Coagulation factor XII (IPI00019581.2)                                                 | 1.00<br>(0.87–1.15) | <b>0.88</b> *<br>(0.75–1.03)      | 0.96<br>(0.84–1.10) | <b>0.87</b> (n.s.)<br>(0.76–1.00) |
| Heparin cofactor 2 (IPI00879573.1)                                                     | 1.00<br>(0.90–1.11) | <b>0.74</b> ***<br>(0.67–0.82)    | 1.18<br>(1.04–1.35) | <b>1.03</b> (n.s.)<br>(0.89–1.19) |
| Inter-alpha-trypsin inhibitor heavy chain 2 (IPI00645038.1)                            | 1.00<br>(0.94–1.06) | <b>0.81</b> **<br>(0.74–0.89)     | 1.05<br>(1.01–1.08) | <b>0.97</b> (n.s.)<br>(0.91–1.04) |
| Tetranectin (IPI00009028.2)                                                            | 1.00<br>(0.91–1.10) | <b>0.80</b> *<br>(0.75–0.85)      | 0.90<br>(0.80–1.02) | <b>0.82</b> (n.s.)<br>(0.76–0.89) |
| <i>Significant change after SG only</i>                                                |                     |                                   |                     |                                   |
| Complement C5 (IPI00032291.2)                                                          | 1.00<br>(0.92–1.08) | <b>1.07</b> (n.s.)<br>(0.99–1.15) | 1.00<br>(0.91–1.09) | <b>1.21</b> *<br>(1.11–1.31)      |
| Complement component C8 alpha chain (IPI00011252.1)                                    | 1.00<br>(0.91–1.10) | <b>1.06</b> (n.s.)<br>(0.97–1.16) | 1.03<br>(0.94–1.12) | <b>1.24</b> *<br>(1.11–1.39)      |
| CFB cDNA FLJ55673, (highly similar to Complement factor B) (IPI00019591.2)             | 1.00<br>(0.93–1.08) | <b>1.04</b> (n.s.)<br>(0.97–1.12) | 0.98<br>(0.91–1.07) | <b>1.17</b> *<br>(1.07–1.29)      |
| Isoform 1 of Inter-alpha-trypsin inhibitor heavy chain H4 (IPI00896419.3)              | 1.00<br>(0.93–1.07) | <b>1.04</b> (n.s.)<br>(0.98–1.10) | 0.97<br>(0.90–1.04) | <b>1.14</b> **<br>(1.08–1.20)     |
| N-acetylmuramoyl-L-alanine amidase (IPI00163207.1)                                     | 1.00<br>(0.88–1.14) | <b>0.89</b> (n.s.)<br>(0.77–1.04) | 1.09<br>(0.96–1.23) | <b>0.85</b> **<br>(0.73–0.98)     |
| <i>Significant change after both surgery types</i>                                     |                     |                                   |                     |                                   |
| Isoform 1 of C-reactive protein (IPI00022389.1)                                        | 1.00<br>(0.82–1.22) | <b>7.79</b> ****<br>(6.07–9.99)   | 0.78<br>(0.61–1.01) | <b>4.32</b> ****<br>(3.47–5.37)   |
| SERPINA3 (highly similar to alpha-1-antichymotrypsin) (IPI01025667.1)                  | 1.00<br>(0.76–1.31) | <b>1.61</b> ****<br>(1.24–2.10)   | 0.92<br>(0.68–1.24) | <b>1.46</b> ****<br>(1.04–2.06)   |
| Complement component C9 (IPI00022395.1)                                                | 1.00<br>(0.92–1.09) | <b>1.43</b> ***<br>(1.34–1.51)    | 0.90<br>(0.80–1.00) | <b>1.42</b> ***<br>(1.36–1.49)    |
| Leucine-rich alpha-2-glycoprotein (IPI00022417.4)                                      | 1.00<br>(0.91–1.10) | <b>1.70</b> ***<br>(1.51–1.91)    | 0.80<br>(0.70–0.91) | <b>1.23</b> **<br>(1.12–1.34)     |
| Apolipoprotein A-IV (IPI00304273.2)                                                    | 1.00<br>(0.86–1.16) | <b>0.40</b> ****<br>(0.34–0.46)   | 0.85<br>(0.78–0.93) | <b>0.49</b> ***<br>(0.42–0.55)    |
| Insulin-like growth factor-binding protein complex acid labile subunit (IPI00925635.1) | 1.00<br>(0.95–1.05) | <b>0.81</b> **<br>(0.75–0.86)     | 0.81<br>(0.76–0.87) | <b>0.63</b> **<br>(0.57–0.69)     |
| Beta-Ala-His dipeptidase (Carnosine dipeptidase 1) (IPI00064667.5)                     | 1.00<br>(0.91–1.10) | <b>0.75</b> **<br>(0.67–0.84)     | 1.11<br>(0.98–1.25) | <b>0.74</b> ***<br>(0.65–0.84)    |
| Kallistatin (IPI00328609.3)                                                            | 1.00<br>(0.95–1.05) | <b>0.70</b> ***<br>(0.66–0.75)    | 1.11<br>(1.01–1.22) | <b>0.90</b> *<br>(0.85–0.95)      |
| Gelsolin (IPI00026314.1)                                                               | 1.00<br>(0.94–1.07) | <b>0.74</b> ***<br>(0.68–0.80)    | 0.89<br>(0.81–0.98) | <b>0.69</b> **<br>(0.68–0.70)     |

**Table 2.** Cont.

| Protein name (Accession No) | pre GBP/pre GBP | post GBP/pre GBP | pre SG/pre GBP | post SG/pre GBP |
|-----------------------------|-----------------|------------------|----------------|-----------------|
| Afamin (IPI00019943.1)      | 1.00            | <b>0.76 ***</b>  | 1.05           | <b>0.80 **</b>  |
|                             | (0.94–1.07)     | (0.70–0.82)      | (0.97–1.14)    | (0.74–0.88)     |

All listed proteins displayed significant ( $p < 0.05$ ) effect of surgery (SG and GBP) as tested by two-way analysis of variance. IPI numbers in brackets refers to accession numbers in the human IPI database; asterisks following ratios denote significant effect of the indicated surgery type according to post-hoc test;

\*,  $p < 0.05$ ;

\*\*\*,  $p < 0.001$ ;

\*\*\*\*,  $p < 0.0001$ ;

n.s., not significant. Values in brackets refer to confidence intervals.

doi:10.1371/journal.pone.0096489.t002

loss achieved by lifestyle [33] and after GBP [34].

The greater decrease of both Fetuin-A and RBP4 seen after GBP than after SG is consistent with an impact of foregut exclusion on reducing these proteins. In the case of RBP4, this may be because diversion of nutrient absorption past the duodenum resulted in reduced foregut absorption of retinol and expression of RBRP2 [21]. Alternatively, altered gut microbiota, which has been reported to occur after both types of surgery [35,36,37], may influence the levels of these plasma proteins. For example, distinct gut microbiota functional changes after GBP may produce less circulating endotoxin levels and thereby incite lower levels of Fetuin-A [37]. Further studies are required to document the functional evolution of gut microbiota after foregut excluding GBP compared to restrictive types of bariatric surgery such as SG in order to test these hypotheses.

Our metabolomic analysis highlighted several metabolites which responded differently to the two types of bariatric surgery. Specifically after GBP, we detected significantly lower levels of the glucogenic amino acids histidine and proline, as well as of citrate and decanoic acid. This response is consistent with improved metabolic status based on several points. Enhanced post-prandial disposal of amino acids and more complete beta-oxidation of fatty acids has been reported following GBP compared with caloric restriction [38]. Elevated free fatty acids are well known to be associated with insulin resistance [39] and decreased decanoic acid after GBP may be a result of a greater uptake of long chain fatty acid into adipocytes [40]. Elevated histidine [41,42] and citrate [43,44,45,46] levels have been linked with insulin resistance and T2D. Although we did not find any correlation between these four metabolites and insulin sensitivity at this early stage, it is possible they may be predictive of future improvements.

Conversely, after SG we detected marked elevation of the branched-chain amino acid catabolite 3-methyl-2-oxo-pentanoic acid, accompanied by a non-significant tendency towards increased levels of all branched-chain amino acids. The latter is a well-known phenomenon in insulin resistance [47]. Also substantially elevated following SG was 2-hydroxybutyrate, which

has been proposed as a plasma biomarker for early stages of diabetes [48] and insulin resistance [49].

Together, the differential early changes in the above metabolites following GBP and SG suggest a more favourable metabolic profile associated with greater insulin sensitivity early after GBP compared with SG. Since both surgery groups were of similar obesity and diabetes status as well as similar in terms of reduced caloric intake at the post-operative time-point, these differences are likely directly linked to the types of bariatric surgery performed.

This study has two major limitations. Firstly, it is limited by small sample size. The subjects were however well matched for baseline clinical characteristics before two relatively similar laparoscopic bariatric surgical procedures with well-matched post-operative protocols for analgesia, fluid replacement and caloric intake. Secondly, the immunodepletion method used in the proteomic analysis improved detection of moderately abundant proteins but had limited ability to prime the samples for detection of proteins of very low abundance in plasma. Depletion techniques targeting a larger number of proteins [50] would allow a more comprehensive analysis in the search for additional novel biomarkers of insulin resistance. Nonetheless, our proteomic study identified significant decreases in RBP4 and Fetuin-A concentrations after GBP but not after SG, which was confirmed using other analytical methods. The metabolomic analysis was also limited to a relatively moderate number of metabolites and future investigations will benefit from the use of more powerful equipment.

Although we were unable to obtain a clear connection between our proteomic and metabolomics findings, by using these two complementary analytical approaches, we managed to identify a number of potentially important changes in key metabolic pathways as well as proteins with known or putative roles in the development of insulin resistance.

In summary, our findings suggest greater lowering of multiple proteins including RBP4, Fetuin-A as well as several metabolites associated with insulin resistance following GBP compared with SG prior to diabetes remission.

**Table 3.** Assessment of correlation between selected proteins and metabolites (showing greater decrease after GBP than SG) with insulin resistance (estimated by HOMA-IR).

|         | Fetuin-A | RBP4      | Proline | Citrate | Histidine | Decanoic acid |
|---------|----------|-----------|---------|---------|-----------|---------------|
| HOMA-IR | 0.36     | 0.48      | 0.10    | 0.06    | -0.04     | -0.07         |
| p       | (<0.05)* | (0.006)** | (0.61)  | (0.74)  | (0.85)    | (0.72)        |

The values shown are Spearman rank correlation coefficients with two-tailed p values for significance of correlation in brackets. Asterisks highlights significant correlations (\*,  $p < 0.05$ ; \*\*,  $p < 0.01$ ).

doi:10.1371/journal.pone.0096489.t003



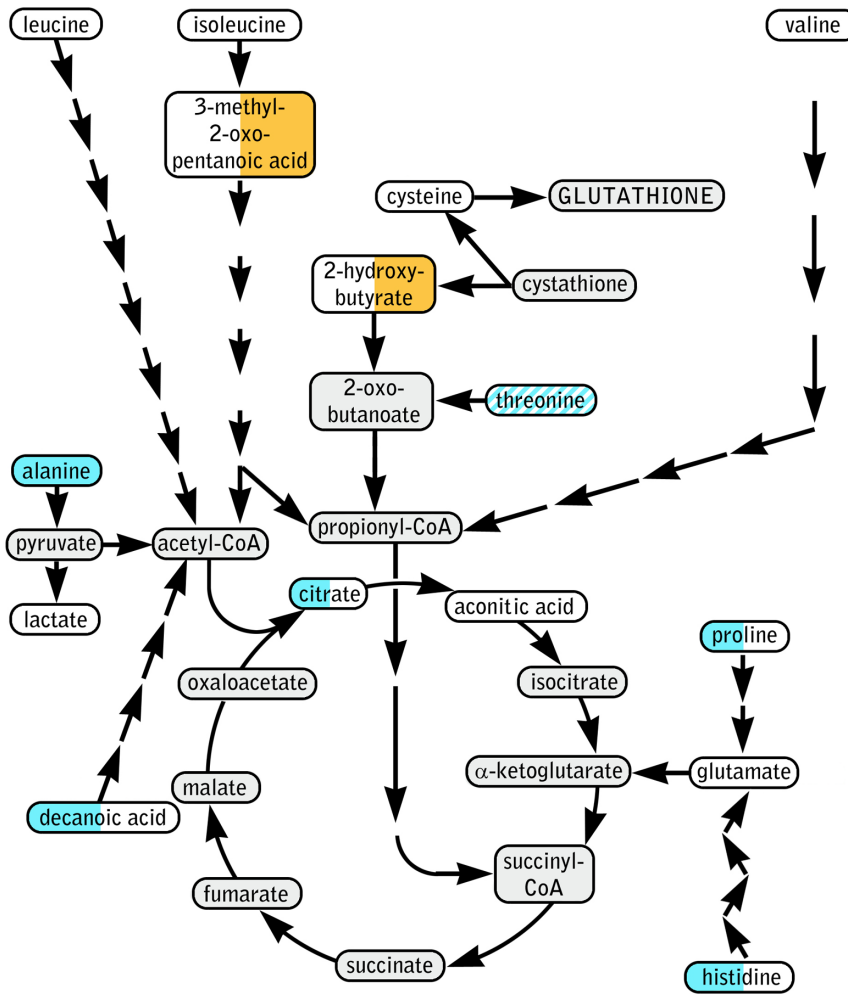

**Figure 5. Schematic of implicated metabolic pathways based on metabolomics results (selected metabolites only).** Metabolites are inscribed in color coded ellipses with the effect of GBP in left half and effect of SG in right half. Color code: blue, significantly lower; orange, significantly higher; white, no significant effect of bariatric surgery; diagonal stripes, significant effect of surgery but not significant in post-hoc test. Grey highlights an undetected metabolite. doi:10.1371/journal.pone.0096489.g005

**Table 4. Metabolites showing significant effect ( $p < 0.05$ ) of bariatric surgery in a Repeated Measures Mixed Model Two-Way ANOVA.**

| Metabolite                   | Pre-GBP     | Post-GBP            | Pre-SG      | Post-SG              | Effect of surgery (p) |
|------------------------------|-------------|---------------------|-------------|----------------------|-----------------------|
|                              | Mean ± SEM  | Mean ± SEM          | Mean ± SEM  | Mean ± SEM           |                       |
| Alanine                      | 1.00 ± 0.09 | <b>0.52 ± 0.04*</b> | 1.27 ± 0.19 | <b>0.68 ± 0.06**</b> | 0.0001                |
| Proline                      | 1.00 ± 0.12 | <b>0.56 ± 0.09*</b> | 1.00 ± 0.18 | 0.71 ± 0.11          | 0.0046                |
| Histidine                    | 1.00 ± 0.12 | <b>0.72 ± 0.07*</b> | 0.78 ± 0.10 | 0.68 ± 0.07          | 0.0073                |
| Threonine                    | 1.00 ± 0.16 | 0.84 ± 0.10         | 0.80 ± 0.14 | 0.78 ± 0.08          | 0.0452                |
| Citric acid                  | 1.00 ± 0.10 | <b>0.76 ± 0.07*</b> | 1.00 ± 0.07 | 0.88 ± 0.07          | 0.0095                |
| Decanoic acid                | 1.00 ± 0.12 | <b>0.67 ± 0.08*</b> | 0.86 ± 0.07 | 0.77 ± 0.07          | 0.0232                |
| 2-Hydroxybutyric acid        | 1.00 ± 0.14 | 1.16 ± 0.17         | 0.97 ± 0.12 | <b>2.01 ± 0.39*</b>  | 0.0359                |
| 3-Methyl-2-oxopentanoic acid | 1.00 ± 0.11 | 0.93 ± 0.14         | 0.81 ± 0.12 | <b>1.57 ± 0.24**</b> | 0.0428                |

Values given are scaled to mean pre-GBP to enable comparison between all groups. Asterisks denote significant difference compared to baseline for the specific surgery type (Sidak's multiple comparisons test); \*,  $p < 0.05$ ; \*\*,  $p < 0.01$ . doi:10.1371/journal.pone.0096489.t004

## Supporting Information

### Table S1 Summary statistics for all identified proteins.

Relative abundance, confidence intervals and outcome of statistical analysis are shown for the 85 proteins identified with sufficient confidence and iTRAQ label in at least 3 within-patient comparisons as well as the final LC-MS/MS run combining samples from all previous runs. Entries in bold showed significant effect of surgery according to the Two-way ANOVA; \*,  $p < 0.05$ ; \*\*,  $p < 0.01$ ; \*\*\*,  $p < 0.001$ , \*\*\*\*,  $p < 0.0001$ ; t, trending ( $p < 0.10$ ); n.s.,  $p > 0.10$ . (DOCX)

### Table S2 Summary statistics for all identified metabolites.

Abundance (relative to averaged pre-operative GBP samples), S.E.M. and outcome of statistical analysis (Two-Way ANOVA followed by Sidak's post-test) are shown for all 45 metabolites identified. Abbreviations: \*,  $p < 0.05$ ; \*\*,  $p < 0.01$ ; \*\*\*,  $p < 0.001$ , \*\*\*\*,  $p < 0.0001$ ; n.s.,  $p > 0.05$ . (DOCX)

## References

- Buchwald H, Estok R, Fahrenbach K, Banel D, Jensen MD, et al. (2009) Weight and type 2 diabetes after bariatric surgery: systematic review and meta-analysis. *Am J Med* 122: 248256 e245256.
- Sjostrom L (2008) Bariatric surgery and reduction in morbidity and mortality: experiences from the SOS study. *Int J Obes (Lond)* 32 Suppl 7: S93–97.
- Abbatini F, Rizzello M, Casella G, Alessandri G, Capocchia D, et al. (2010) Long-term effects of laparoscopic sleeve gastrectomy, gastric bypass, and adjustable gastric banding on type 2 diabetes. *Surg Endosc* 24: 1005–1010.
- Rao RS, Yanagisawa R, Kini S (2012) Insulin resistance and bariatric surgery. *Obes Rev* 13: 316–328.
- Wickremesekera K, Miller G, Naotunne TD, Knowles G, Stubbs RS (2005) Loss of insulin resistance after Roux-en-Y gastric bypass surgery: a time course study. *Obes Surg* 15: 474–481.
- Cummings DE (2009) Endocrine mechanisms mediating remission of diabetes after gastric bypass surgery. *Int J Obes (Lond)* 33 Suppl 1: S33–40.
- Peterli R, Wolnerhanssen B, Peters T, Devaux N, Kern B, et al. (2009) Improvement in glucose metabolism after bariatric surgery: comparison of laparoscopic Roux-en-Y gastric bypass and laparoscopic sleeve gastrectomy: a prospective randomized trial. *Ann Surg* 250: 234–241.
- Rubino F, Gagner M, Gentileschi P, Kini S, Fukuyama S, et al. (2004) The early effect of the Roux-en-Y gastric bypass on hormones involved in body weight regulation and glucose metabolism. *Ann Surg* 240: 236–242.
- Cummings DE, Overduin J, Foster-Schubert KE, Carlson MJ (2007) Role of the bypassed proximal intestine in the anti-diabetic effects of bariatric surgery. *Surg Obes Relat Dis* 3: 109–115.
- Blonder J, Issaq HJ, Veenstra TD (2011) Proteomic biomarker discovery: it's more than just mass spectrometry. *Electrophoresis* 32: 1541–1548.
- Millioni R, Tolin S, Puricelli L, Sbrignadello S, Fadini GP, et al. (2011) High abundance proteins depletion vs low abundance proteins enrichment: comparison of methods to reduce the plasma proteome complexity. *PLoS One* 6: e19603.
- Oberbach A, von Bergen M, Blüher M, Lehmann S, Till H (2012) Combined serum proteomic and metabolomic profiling after laparoscopic sleeve gastrectomy in children and adolescents. *J Laparoendosc Adv Surg Tech A* 22: 184–188.
- Friedrich N (2012) Metabolomics in diabetes research. *J Endocrinol* 215: 29–42.
- Mutch DM, Fuhrmann JC, Rein D, Wiemer JC, Bouillot JL, et al. (2009) Metabolite profiling identifies candidate markers reflecting the clinical adaptations associated with Roux-en-Y gastric bypass surgery. *PLoS One* 4: e7905.
- Yip S, Signal M, Smith G, Beban G, Booth M, et al. (2014) Lower glycemic fluctuations early after bariatric surgery partially explained by caloric restriction. *Obes Surg* 24: 62–70.
- Jullig M, Chen X, Middleleditch MJ, Vazhoor G, Hickey AJ, et al. (2010) Illuminating the molecular basis of diabetic arteriopathy: a proteomic comparison of aortic tissue from diabetic and healthy rats. *Proteomics* 10: 3367–3378.
- Stefan N, Fritsche A, Weikert C, Boeing H, Joost HG, et al. (2008) Plasma fetuin-A levels and the risk of type 2 diabetes. *Diabetes* 57: 2762–2767.
- Graham TE, Yang Q, Blüher M, Hammarstedt A, Ciaraldi TP, et al. (2006) Retinol-binding protein 4 and insulin resistance in lean, obese, and diabetic subjects. *N Engl J Med* 354: 2552–2563.
- Christou GA, Tselepis AD, Kiortsis DN (2012) The metabolic role of retinol binding protein 4: an update. *Horm Metab Res* 44: 6–14.
- Yang Q, Graham TE, Mody N, Preitner F, Peroni OD, et al. (2005) Serum retinol binding protein 4 contributes to insulin resistance in obesity and type 2 diabetes. *Nature* 436: 356–362.
- Alapatt P, Guo F, Komanetsky SM, Wang S, Cai J, et al. (2013) Liver retinol transporter and receptor for serum retinol-binding protein (RBP4). *J Biol Chem* 288: 1250–1265.
- Janke J, Engeli S, Boschmann M, Adams F, Bohnke J, et al. (2006) Retinol-binding protein 4 in human obesity. *Diabetes* 55: 2805–2810.
- Gomez-Ambrosi J, Rodriguez A, Catalan V, Ramirez B, Silva C, et al. (2008) Serum retinol-binding protein 4 is not increased in obesity or obesity-associated type 2 diabetes mellitus, but is reduced after relevant reductions in body fat following gastric bypass. *Clin Endocrinol (Oxf)* 69: 208–215.
- Oberbach A, Blüher M, Wirth H, Till H, Kovacs P, et al. (2011) Combined proteomic and metabolomic profiling of serum reveals association of the complement system with obesity and identifies novel markers of body fat mass changes. *J Proteome Res* 10: 4769–4788.
- Ou HY, Yang YC, Wu HT, Wu JS, Lu FH, et al. (2011) Serum fetuin-A concentrations are elevated in subjects with impaired glucose tolerance and newly diagnosed type 2 diabetes. *Clin Endocrinol (Oxf)* 75: 450–455.
- Gunduz FO, Yildirmak ST, Temizel M, Faki Y, Cakmak M, et al. (2011) Serum visfatin and fetuin-a levels and glycemic control in patients with obese type 2 diabetes mellitus. *Diabetes Metab J* 35: 523–528.
- Mori K, Emoto M, Inaba M (2012) Fetuin-A and the cardiovascular system. *Adv Clin Chem* 56: 175–195.
- Pal D, Dasgupta S, Kundu R, Maitra S, Das G, et al. (2012) Fetuin-A acts as an endogenous ligand of TLR4 to promote lipid-induced insulin resistance. *Nat Med* 18: 1279–1285.
- Li W, Zhu S, Li J, Huang Y, Zhou R, et al. (2011) A hepatic protein, fetuin-A, occupies a protective role in lethal systemic inflammation. *PLoS One* 6: e16945.
- Wang H, Zhu S, Zhou R, Li W, Sama AE (2008) Therapeutic potential of HMGB1-targeting agents in sepsis. *Expert Rev Mol Med* 10: e32.
- Weikert C, Stefan N, Schulze MB, Pischon T, Berger K, et al. (2008) Plasma fetuin-a levels and the risk of myocardial infarction and ischemic stroke. *Circulation* 118: 2555–2562.
- Tuttolomondo A, Di Raimondo D, Di Sciacca R, Casuccio A, Bivona G, et al. (2010) Fetuin-A and CD40 L plasma levels in acute ischemic stroke: differences in relation to TOAST subtype and correlation with clinical and laboratory variables. *Atherosclerosis* 208: 290–296.
- Reinehr T, Roth CL (2008) Fetuin-A and its relation to metabolic syndrome and fatty liver disease in obese children before and after weight loss. *J Clin Endocrinol Metab* 93: 4479–4485.
- Brix JM, Stingl H, Hollerl F, Schemthaner GH, Kopp HP, et al. (2010) Elevated Fetuin-A concentrations in morbid obesity decrease after dramatic weight loss. *J Clin Endocrinol Metab* 95: 4877–4881.
- Kong LC, Tap J, Aron-Wisniewsky J, Pelloux V, Basdevant A, et al. (2013) Gut microbiota after gastric bypass in human obesity: increased richness and associations of bacterial genera with adipose tissue genes. *Am J Clin Nutr* 98: 16–24.
- Patil DP, Dhotre DP, Chavan SG, Sultan A, Jain DS, et al. (2012) Molecular analysis of gut microbiota in obesity among Indian individuals. *J Biosci* 37: 647–657.
- Aron-Wisniewsky J, Dore J, Clement K (2012) The importance of the gut microbiota after bariatric surgery. *Nat Rev Gastroenterol Hepatol* 9: 590–598.
- Khoo LC, Muehlbauer MJ, Stevens RD, Pamuklar Z, Chen J, et al. (2013) Postprandial Metabolite Profiles Reveal Differential Nutrient Handling After Bariatric Surgery Compared With Matched Caloric Restriction. *Ann Surg*.
- Groop LC, Saloranta C, Shank M, Bonadonna RC, Ferrannini E, et al. (1991) The role of free fatty acid metabolism in the pathogenesis of insulin resistance in obesity and noninsulin-dependent diabetes mellitus. *J Clin Endocrinol Metab* 72: 96–107.

### Checklist S1 TREND Checklist used in this study.

(DOCX)

### Protocol S1 Proteomic sub-study protocol detailing patient recruitment, exclusion criteria and study protocol.

(DOCX)

## Acknowledgments

We would like to thank the participants.

## Author Contributions

Conceived and designed the experiments: MJ SY AX MB RB GB RM. Performed the experiments: SY MJ GS RM. Analyzed the data: SY MJ GS RM. Contributed reagents/materials/analysis tools: RM. Wrote the paper: MJ SY RM. Critical revision of the manuscript: AX GS MM MB RB GB.

40. Petrescu O, Fan X, Gentileschi P, Hossain S, Bradbury M, et al. (2005) Long-chain fatty acid uptake is upregulated in omental adipocytes from patients undergoing bariatric surgery for obesity. *Int J Obes (Lond)* 29: 196–203.
41. Huffman KM, Shah SH, Stevens RD, Bain JR, Muchlbauer M, et al. (2009) Relationships between circulating metabolic intermediates and insulin action in overweight to obese, inactive men and women. *Diabetes Care* 32: 1678–1683.
42. Fiehn O, Garvey WT, Newman JW, Lok KH, Hoppel CL, et al. (2010) Plasma metabolomic profiles reflective of glucose homeostasis in non-diabetic and type 2 diabetic obese African-American women. *PLoS One* 5: e15234.
43. Cupisti A, Meola M, D'Alessandro C, Bernabini G, Pasquali E, et al. (2007) Insulin resistance and low urinary citrate excretion in calcium stone formers. *Biomed Pharmacother* 61: 86–90.
44. Isken F, Schulz TJ, Mohlig M, Pfeiffer AF, Ristow M (2006) Chemical inhibition of citrate metabolism alters glucose metabolism in mice. *Horm Metab Res* 38: 543–545.
45. DeVilliers DC, Jr., Dixit PK, Lazarow A (1966) Citrate metabolism in diabetes. I. Plasma citrate in alloxan-diabetic rats and in clinical diabetes. *Metabolism* 15: 458–465.
46. Li H, Xie Z, Lin J, Song H, Wang Q, et al. (2008) Transcriptomic and metabolomic profiling of obesity-prone and obesity-resistant rats under high fat diet. *J Proteome Res* 7: 4775–4783.
47. Adeva MM, Calvino J, Souto G, Donapetry C (2012) Insulin resistance and the metabolism of branched-chain amino acids in humans. *Amino Acids* 43: 171–181.
48. Li X, Xu Z, Lu X, Yang X, Yin P, et al. (2009) Comprehensive two-dimensional gas chromatography/time-of-flight mass spectrometry for metabolomics: Biomarker discovery for diabetes mellitus. *Anal Chim Acta* 633: 257–262.
49. Gall WE, Beebe K, Lawton KA, Adam KP, Mitchell MW, et al. (2010) alpha-hydroxybutyrate is an early biomarker of insulin resistance and glucose intolerance in a nondiabetic population. *PLoS One* 5: e10883.
50. Merrell K, Southwick K, Graves SW, Esplin MS, Lewis NE, et al. (2004) Analysis of low-abundance, low-molecular-weight serum proteins using mass spectrometry. *J Biomol Tech* 15: 238–248.
